# Supplementary material for: Acute toxicity and responses of antioxidant systems to dibutyl phthalate in neonate and adult Daphnia magna
Source: PeerJ. 2019 Mar 14;7:e6584. doi: 10.7717/peerj.6584 (PMC6421057; doi:10.7717/peerj.6584)
Supplement: Supplemental Information 1 — Table 1 raw data is available in Sheet 1 (neonate acute) and Sheet 2 (adult acute). Figure 1 raw data is available in Sheet 3 (H2O2). Figure 2 raw data is available in Sheet 4 (MDA). Figure 3 raw data is available in Sheet 5 (T-AOC). Figure 4 raw data is available in Sheet 6 (SOD). Figure 5 raw data is available in Sheet 7 (CAT). Figure 6 raw data is available in Sheet 8 (GST). [file peerj-07-6584-s001.xlsx]

## Sheet: Neonatal acute 
Actue toxic assay of 24 h in nenoate Daphnia magna
DBP(mg/L)	Total number	Mortality of each replicate （%）					Total mortality（%）
		1	2	3	4	5
0(Control)	50	0	0	0	0	0	0
0(solvent control)	50	0	0	0	0	0	0
1	50	10	0	10	0	0	4
2	50	20	10	20	30	20	20
3	50	40	40	30	40	50	40
4	50	50	60	50	70	70	60
5	50	60	70	70	70	80	70
Goodness⁃of⁃fit test	y= -1.819 + 3.361x
	x2=0.195
	p=0.978
	R2=0.998
LC50(24h)	3.478
Confidence interval	3.084-3.994
Actue toxic assay of 48 h in nenoate Daphnia magna
DBP(mg/L)	Total number	Mortality of each replicate （%）					Total mortality（%）
		1	2	3	4	5
	50	0	0	0	0	0	0
0(Control)	50	0	0	0	0	0	0
0(solvent control)	50	10	20	20	10	10	14
2	50	30	40	30	30	40	34
3	50	50	50	60	50	40	50
4	50	60	70	60	70	60	64
5	50	70	80	70	80	80	76
Goodness⁃of⁃fit test	y= -1.414 + 2.523x
	x2=0.426
	p=0.935
	R2=0.992
LC50(48h)	2.834
Confidence interval	2.424-3.328

## Sheet: Adult acute
Actue toxic assey of 24 h in adult Daphnia magna
DBP(mg/L)	Total number	Mortality of each replicate （%）					Total mortality（%）
		1	2	3	4	5
0(Control)	50	0	0	0	0	0	0
0(solvent control)	50	0	0	0	0	0	0
1	50	10	0	0	0	0	2
2	50	10	10	10	10	10	10
3	50	20	30	30	20	20	24
4	50	40	40	30	40	30	36
5	50	50	60	50	60	50	54
Goodness⁃of⁃fit test	y= -1.258 + 3.187x
	x2=0.530
	p=0.912
	R2=0.991
LC50(24h)	4.923
Confidence interval	4.220-6.316
Actue toxic assey of 48 h in adult Daphnia magna
DBP(mg/L)	Total number	Mortality of each replicate （%）					Total mortality（%）
		1	2	3	4	5
0(Control)	50	0	0	0	0	0	0
0(solvent control)	50	0	0	0	0	0	0
1	50	10	20	10	10	10	12
2	50	20	30	20	20	30	24
3	50	30	40	30	40	40	36
4	50	30	50	40	50	50	44
5	50	60	50	60	70	60	60
Goodness⁃of⁃fit test	y= -1.258+ 1.984x
	x2=0.977
	p=0.807
	R2=0.972
LC50(48h)	4.305
Confidence interval	3.502-6.034

## Sheet: H202
Figure 1a DBP induced changes of H2O2 in neonate D. magna
DBP concentration（mg/L)	Time(h)	Replications H2O2 Data （nmol/mg）				Mean value	SD
Control	0	4.17767	4.72562	5.54027	5.20936	4.91323	0.59361
	24	4.76205	6.30058	7.50069	6.59176	6.28877	1.13894
	48	7.38118	8.5917	6.51784	6.33823	7.20724	1.02915
0.5	0	4.17767	4.72562	5.54027	5.20936	4.91323	0.59361
	24	18.8574	18.2902	18.2902	15.204	17.6605	1.65932
	48	15.8272	17.584	18.1907	18.2397	17.4604	1.12889
2	0	4.17767	4.72562	5.54027	5.20936	4.91323	0.59361
	24	9.84157	8.86019	7.87572	7.49438	8.51797	1.05345
	48	20.3812	20.5607	19.5333	18.732	19.8018	0.842267
Figure 1b DBP induced changes of H2O2 content in adult D. magna
DBP concentration（mg/L)	Time(h)	Replications H2O2 Data （nmol/mg）				Mean value	SD
Control	0	6.38321	6.53636	6.30971	6.96629	6.54889	0.293848
	24	4.48316	4.21814	4.45087	5.2397	4.59797	0.443811
	48	5.77658	5.41244	5.08092	5.73783	5.50194	0.324722
0.5	0	6.38321	6.53636	6.30971	6.96629	6.54889	0.293848
	24	5.98585	5.75062	5.87572	6.78901	6.1003	0.469091
	48	7.21024	7.10074	8.50124	8.00749	7.70493	0.667184
2	0	6.38321	6.53636	6.30971	6.96629	6.54889	0.293848
	24	12.4129	11.2699	12.2181	12.8664	12.1918	0.671957
	48	11.5423	11.6371	12.1144	11.7247	11.7546	0.251154

## Sheet: MDA
Figure 2a DBP induced changes of MDA in neonate D. magna
DBP concentration（mg/L)	Time(h)	Replications MDA Data（nmol/mg）				Mean value	SD
Control	0	7.68377	7.57952	7.47862	6.3669	7.2772	0.612621
	24	7.69667	6.09667	6.19667	8.59667	7.14667	1.21244
	48	2.06883	3.00968	3.25883	2.25883	2.64905	0.574692
0.5	0	7.68377	7.57952	7.47862	6.3669	7.2772	0.612621
	24	9.20274	16.3499	16.2489	20.5101	15.5779	4.69096
	48	5.59382	8.17493	14.7469	14.9553	10.8677	4.71951
2	0	7.68377	7.57952	7.47862	6.3669	7.2772	0.612621
	24	59.5095	56.7384	53.4646	53.1749	55.7218	2.99788
	48	66.7054	60.6935	69.1237	69.8812	66.6009	4.16467
Figure 2b DBP induced changes of MDA in adult D. magna
DBP concentration（mg/L)	Time(h)	Replications MDA Data（nmol/mg）				Mean value	SD
Control	0	5.75475	6.76191	6.21298	5.52036	6.0625	0.547859
	24	3.40842	3.81497	4.50601	3.41835	3.78693	0.515422
	48	2.64153	2.16759	2.37307	1.64344	2.20641	0.422512
0.5	0	5.75475	6.76191	6.21298	5.52036	6.0625	0.547859
	24	4.93085	5.52166	4.98032	4.49782	4.98266	0.419635
	48	5.61472	5.29856	4.81733	3.71914	4.86244	0.82972
2	0	5.75475	6.76191	6.21298	5.52036	6.0625	0.547859
	24	9.8617	8.34524	7.16865	8.42786	8.45086	1.10246
	48	8.40139	8.701	8.61811	9.11468	8.70879	0.298621

## Sheet: T-AOC
Figure 3a DBP induced changes of T-AOC in neonate D. magna
DBP concentration（mg/L)	Time(h)	Replications T-AOC Data（U/mg）				Mean value	SD
Control	0	3.7978	3.7517	3.3372	3.17765	3.51609	0.306276
	24	3.8603	3.57491	3.5432	3.60662	3.64626	0.145025
	48	3.76517	3.47978	3.70175	3.73346	3.67004	0.129456
0.5	0	3.7978	3.7517	3.3372	3.17765	3.51609	0.306276
	24	0.096323	0.124862	0.112178	0.08681	0.105043	0.0168541
	48	0.15023	0.099494	0.11852	0.140717	0.12724	0.0227746
2	0	3.7978	3.7517	3.3372	3.17765	3.51609	0.306276
	24	0.134375	0.124862	0.08681	0.099494	0.111385	0.0220265
	48	0.140717	0.134375	0.096323	0.128033	0.124862	0.0197181
Figure 3b DBP induced changes of T-AOC in adult D. magna
DBP concentration（mg/L)	Time(h)	Replications T-AOC Data（U/mg）				Mean value	SD
Control	0	0.771746	0.877492	0.752272	0.75272	0.788557	0.0599802
	24	0.737741	0.836028	0.936028	0.936028	0.861456	0.0949984
	48	0.788457	0.728938	0.951225	0.878685	0.836826	0.0980114
0.5	0	0.771746	0.877492	0.752272	0.75272	0.788557	0.0599802
	24	0.109007	0.093152	0.115349	0.124862	0.110593	0.0133283
	48	0.143888	0.140717	0.137546	0.131204	0.138339	0.00541551
2	0	0.771746	0.877492	0.752272	0.75272	0.788557	0.0599802
	24	0.074126	0.070955	0.0745	0.045587	0.066292	0.0138946
	48	0.061442	0.105836	0.134375	0.093152	0.0987012	0.0302356

## Sheet: SOD
Figure 4a DBP induced changes of SOD activity in neonate D. magna
DBP concentration（mg/L)	Time(h)	Replications SOD Data（U/mg）				Mean value	SD
Control	0	9.29088	9.65464	9.86428	9.67349	9.62082	0.239481
	24	5.57468	5.29573	5.72034	5.92927	5.63001	0.266159
	48	6.99688	6.02928	6.065	5.83944	6.23265	0.519015
0.5	0	9.29088	9.65464	9.86428	9.67349	9.62082	0.239481
	24	12.0496	11.7749	11.778	12.1253	11.9319	0.182212
	48	4.28177	4.01725	4.4864	4.41159	4.29925	0.206135
2	0	9.29088	9.65464	9.86428	9.67349	9.62082	0.239481
	24	1.24538	1.86707	1.22636	1.78427	1.53077	0.342282
	48	4.59282	3.67072	3.39436	4.42637	4.02107	0.579275
Figure 4b DBP induced changes of SOD activity in adult D. magna
DBP concentration（mg/L)	Time(h)	Replications SOD Data（U/mg）				Mean value	SD
Control	0	4.00864	6.12229	4.31893	4.61166	4.76538	0.937516
	24	8.06403	8.89522	7.35819	7.95468	8.06803	0.632715
	48	9.86861	8.3297	9.18685	9.28049	9.16641	0.63419
0.5	0	4.00864	6.12229	4.31893	4.61166	4.76538	0.937516
	24	13.2471	13.5482	13.2212	13.094	13.2776	0.1924
	48	7.25182	6.67213	6.27278	6.84485	6.7604	0.405872
2	0	4.00864	6.12229	4.31893	4.61166	4.76538	0.937516
	24	3.77739	3.49424	3.6896	3.83402	3.69881	0.148763
	48	1.32482	1.2059	1.03528	1.15082	1.17921	0.120326

## Sheet: CAT
Figure 5a DBP induced changes of CAT activity in neonate D. magna
DBP concentration（mg/L)	Time(h)	Replications CAT Data（U/mg）				Mean value	SD
Control	0	26.7203	28.2573	22.5099	23.5488	25.2591	2.68372
	24	34	34.2774	35.4836	35.2349	34.749	0.720905
	48	39.826	45.6437	33.5943	36.7227	38.9467	5.13866
0.5	0	26.7203	28.2573	22.5099	23.5488	25.2591	2.68372
	24	29	26.4208	27.5216	25.7339	27.1691	1.42553
	48	28.2473	22.6464	28.5031	27.2806	26.6693	2.73316
2	0	26.7203	28.2573	22.5099	23.5488	25.2591	2.68372
	24	24.5837	20.9078	21.4002	21.0811	21.9932	1.73899
	48	58.9701	51.6406	50.8085	51.0967	53.129	3.90936
Figure 5b DBP induced changes of CAT activity in adult D. magna
DBP concentration（mg/L)	Time(h)	Replications CAT Data（U/mg）				Mean value	SD
Control	0	26.751	33.026	27.3011	32.8064	29.9711	3.40927
	24	66.811	63.8984	61.5183	64.5488	64.1941	2.17725
	48	61.1019	65.1276	66.2147	68.655	65.2748	3.14875
0.5	0	26.751	33.026	27.3011	32.8064	29.9711	3.40927
	24	19.412	17.8746	17.8848	18.5976	18.4422	0.729764
	48	20.653	12.8415	19.8156	18.5976	17.9769	3.52606
2	0	26.751	33.026	27.3011	32.8064	29.9711	3.40927
	24	18.2447	12.9443	19.8156	10.767	15.4429	4.28474
	48	1.30421	7.3041	6.75392	2.66835	4.50765	2.9727

## Sheet: GST
Figure 6a DBP induced changes of GST activity in neonate D. magna
DBP concentration（mg/L)	Time(h)	Replications GST Data（U/mg）				Mean value	SD
Control	0	74.6472	73.3348	64.187	74.0211	71.5475	4.93621
	24	98.59	94.8635	90.5116	92.3363	94.0754	3.49893
	48	72.8289	72.0109	82.7349	86.7686	78.5858	7.31536
0.5	0	74.6472	73.3348	64.187	74.0211	71.5475	4.93621
	24	110.206	120.326	110.419	121.758	115.677	6.22288
	48	60.3637	33.1127	44.3175	38.2498	44.011	11.8247
2	0	74.6472	73.3348	64.187	74.0211	71.5475	4.93621
	24	8.75875	12.4313	31.0782	20.9403	18.3021	9.92861
	48	85.1864	78.1396	84.9613	89.709	84.4991	4.77049
Figure 6b DBP induced changes of GST activity in adult D. magna
DBP concentration（mg/L)	Time(h)	Replications GST Data（U/mg）				Mean value	SD
Control	0	97.159	95.9535	95.1681	93.8096	95.5226	1.40518
	24	87.2853	83.6744	68.6047	92.7227	83.0718	10.3369
	48	105.244	103.51	97.7226	84.3636	97.7098	9.46073
0.5	0	97.159	95.9535	95.1681	93.8096	95.5226	1.40518
	24	21.6883	21.3663	45.5814	30.4586	29.7737	11.3492
	48	25.6835	25.323	28.2047	37.3801	29.1478	5.63588
2	0	97.159	95.9535	95.1681	93.8096	95.5226	1.40518
	24	8.67533	17.9927	28.7883	7.8373	15.8234	9.79228
	48	59.15	30.0837	56.2083	58.2686	50.9277	13.9505
